# Supplementary material for: Disruption of the kringle 1 domain of prothrombin leads to late onset mortality in zebrafish
Source: PubMed Central journal article supplement (PMC7055286; doi:10.1038/s41598-020-60840-7), 2020-03-04
Supplement: 41598_2020_60840_MOESM1_ESM.pdf [file 41598_2020_60840_MOESM1_ESM.pdf]

**Table S1: Oligonucleotide sequences used in methods**

| Primer Description                       | Primer Sequence                            |
|------------------------------------------|--------------------------------------------|
| f2 qPCR Forward                          | GAGGAAGCTCGAGAAGTGTTT                      |
| f2 qPCR Reverse                          | CCCTCTGTAGTCGCACATATTC                     |
| f2 qPCR Probe                            | FAM/TGGACAGGG/ZEN/TTGTTTCCTTCACAGC/IABkFQ  |
| actb2 qPCR Forward                       | ATGAAGATCCTGACCGAGAGA                      |
| actb2 qPCR Reverse                       | TCAAAGTCAAGGGCCACATAG                      |
| actb2 qPCR Probe                         | FAM/ACCACCACA/ZEN/GCTGAGAGGGAAATT/IABkFQ   |
| f2 delta Flanking Forward                | GAGGAAGCTCGAGAAGTGTTT                      |
| f2 delta Flanking Reverse                | AAAACACCAAGGGCCATCTTT                      |
| f2 genotyping Forward                    | TGCCTTTAGTGATGTTCCCTCTG                    |
| f2 genotyping Reverse                    | CTGACAGTCGGGTCTCTGGT                       |
| F2 SMRT sequencing Forward               | AGGCTGTGAAGGAACAACC                        |
| F2 SMRT sequencing Reverse               | CTGATCAGACTGGCTCCAC                        |
| human F2 with vector homology Forward    | TGGCTAGTTAAGCTTGGTACATGGCTCATGTGCGGGGCC    |
| human F2 with vector homology Reverse    | TTAGGGATAGGCTTACCTTCTCCGAAC TGGTCGATCAC    |
| human F2 $\Delta$ 45 mutagenesis Forward | CGAGATCGAGAACCCCGATAGCAGCACCACC            |
| human F2 $\Delta$ 45 mutagenesis Reverse | CGGGGTCTCGATCTCGGGCTTGTGGGGGT              |
| human F2 C138A mutagenesis Forward       | GAGACAGGAAGCATCGATCCCCGTCTGCGGCCAGGATCAGG  |
| human F2 C138A mutagenesis Reverse       | AGACGGGGATCGATGCTTCCTGTCTCCGCACGGTGGGGTCCG |
| Antisense Riboprobe + T7 Forward         | TAATACGACTCACTATAGGGGTGATGATGACCGAGGTGGA   |
| Antisense Riboprobe Reverse              | CCGACTGTCAGGAGGGAGAC                       |
